# Supplementary material
Source: Springer Nature journal article supplement (https://www.springermedizin.de/resource/supplementary/12936_2012_2167_MOESM4_ESM.pdf/9542856)
Supplement: MOESM4 [file 9542856]

10gct/ $\mu$ L

1.0gct/ $\mu$ L

0.1gct/ $\mu$ L

(1) Sample spotted onto  
filter paper/non filter  
paper matrix

903

FTA

3MM

(2) Stored for  
up to 13 weeks

(a) Frozen  
conditions: -  
80°C, -20°C

(b) Cold  
chain: 4°C

(c) Ambient/hot  
temperatures:  
22°C, 35°C, with /  
without humidity

(d) Selection of  
conditions: -20°C,  
RT°C, 35°C

(3) RNA extracted by  
optimal method

(4) Molecular  
detection of mRNA

QT-NASBA

RT-PCR
